# Supplementary material for: Large-area printed low-voltage organic thin film transistors via minimal-solution bar-coating
Source: Royal Society of Chemistry journal article supplement (doi:10.1039/d0tc03089a), 2020-01-01
Supplement: d0tc03089a1.pdf [file d0tc03089a1.pdf]

## Supporting Information

# Large-area Printed Low-voltage Organic Thin Film Transistors via Minimal-solution Bar-coating

Sujin Sung,<sup>‡a</sup> Won-June Lee,<sup>‡a</sup> Marcia M. Payne,<sup>b</sup> John E. Anthony,<sup>b</sup> Chang-Hyun Kim<sup>\*c</sup> and Myung-Han Yoon<sup>\*a</sup>

<sup>a</sup> School of Materials Science and Engineering, Gwangju Institute of Science and Technology, Gwangju 61005, Republic of Korea

<sup>b</sup> Department of Chemistry, University of Kentucky, Lexington, Kentucky 40506, United States of America

<sup>c</sup> Department of Electronic Engineering, Gachon University, Seongnam 13120, Republic of Korea

\* Corresponding author

Prof. Chang-Hyun Kim (chang-hyun.kim@gachon.ac.kr)

Prof. Myung-Han Yoon (mhyoon@gist.ac.kr)

<sup>‡</sup> These authors have contributed equally to this work.

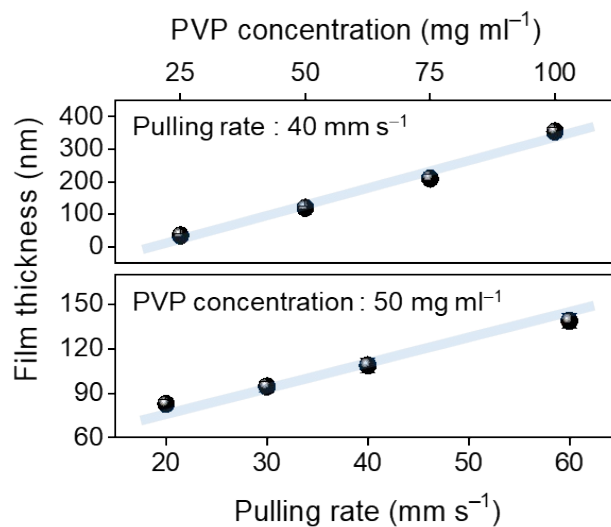

$$Ca = \mu v / \gamma$$

$Ca$  : capillary number =  $\sim 10^{-3}$

$\mu$  : dynamic viscosity = 2.31 cP (25 °C)

$v$  : bar-pulling rate = 0.04 m s<sup>-1</sup>

$\gamma$  : surface tension of the solvent = 0.0269 N m<sup>-1</sup>

(1 cP = 10<sup>-3</sup> N·s m<sup>-2</sup>)

**Figure S1.** 2D graph for controllable thickness variation with solution concentration (from 25 to 100 mg ml<sup>-1</sup>), bar-pulling rate (from 20 to 60 mm s<sup>-1</sup>), and calculated capillary number from experimentally measured viscosity value for explanation of the increase of film thickness.

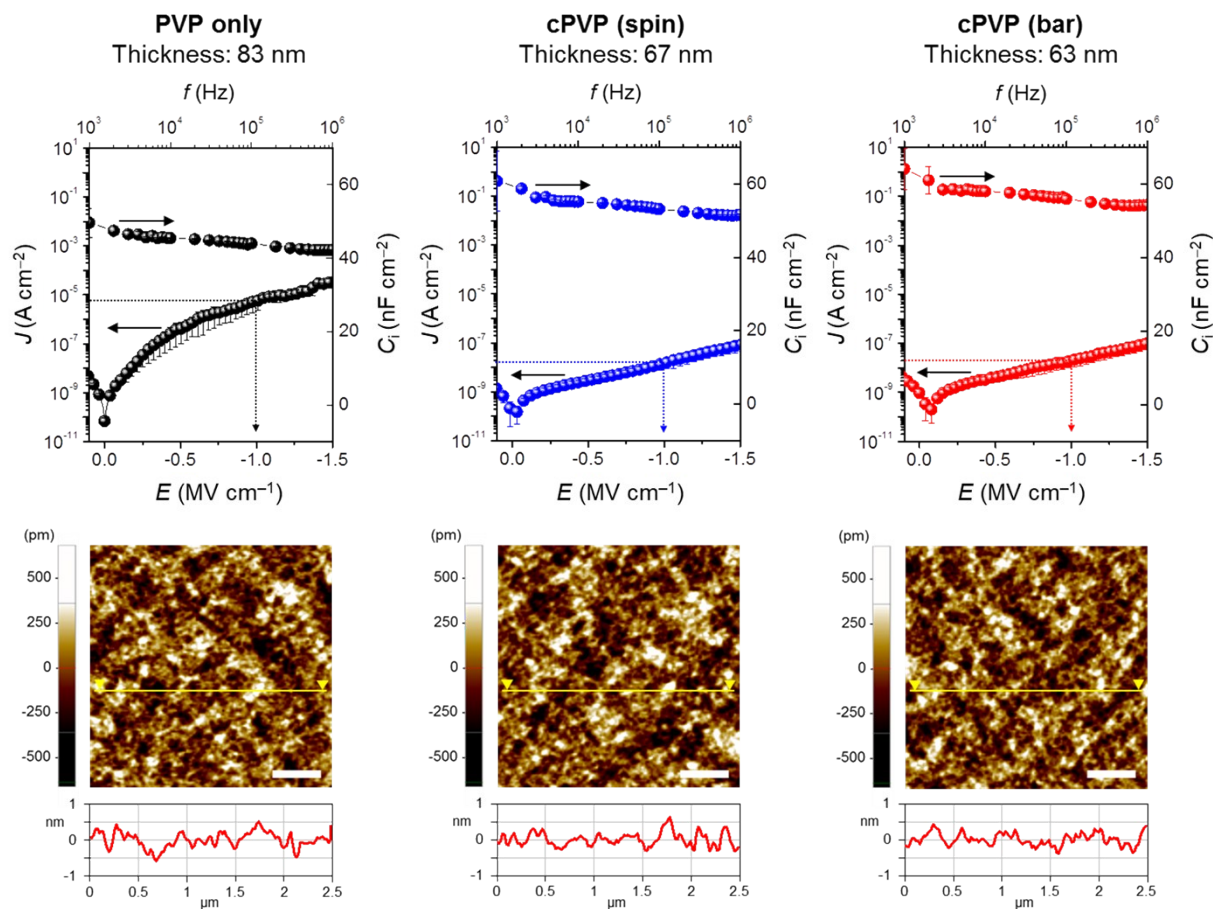

**Figure S2.** Leakage current density ( $J$ ) versus electric field ( $E$ ), capacitance ( $C_i$ ) versus frequency ( $f$ ), and AFM images of the pristine PVP (left), spin- (center) and bar-coated (right) cPVP films. Scale bars in the AFM images: 1  $\mu\text{m}$ .

|          | 150 °C                                                                            | 200 °C                                                                             | 250 °C                                                                              |
|----------|-----------------------------------------------------------------------------------|------------------------------------------------------------------------------------|-------------------------------------------------------------------------------------|
| cPVP     | 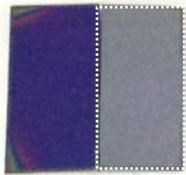 | 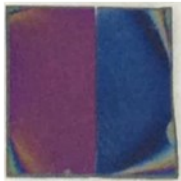 | 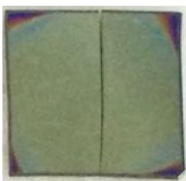 |
| PVP only | 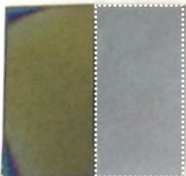 | 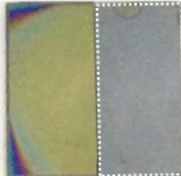 | 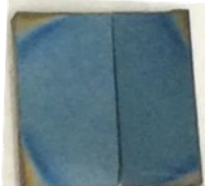 |

**Figure S3.** Photographs that visualize the effect of cross-linker and annealing temperature on the chemical resistance of PVP. For each film, the right-hand side was immersed in the mother solvent (PGMEA). The cPVP films were made of PVP:HDA = 10:1 in weight.

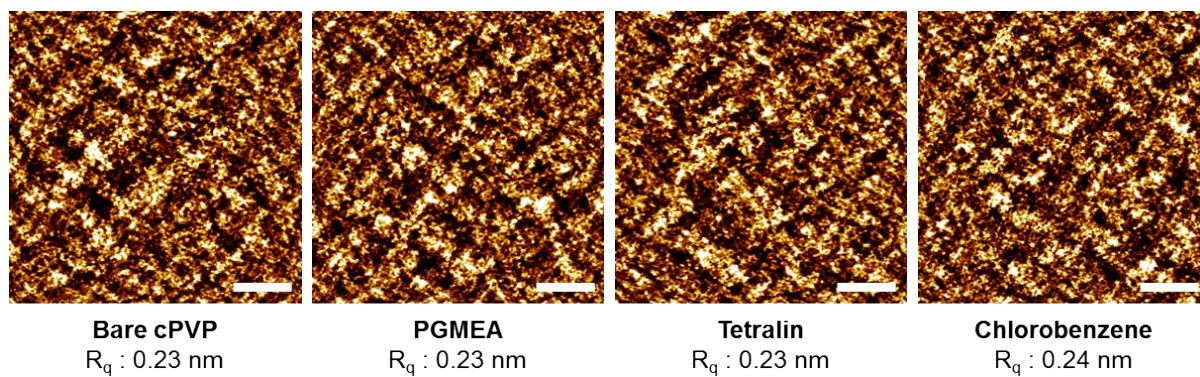

**Figure S4.** AFM topography of a fully cross-linked polymer film treated by various organic solvents (scale bars:  $1 \mu\text{m}$ ). Note that the roughness of bare cPVP remains practically unchanged upon solvent treatment.

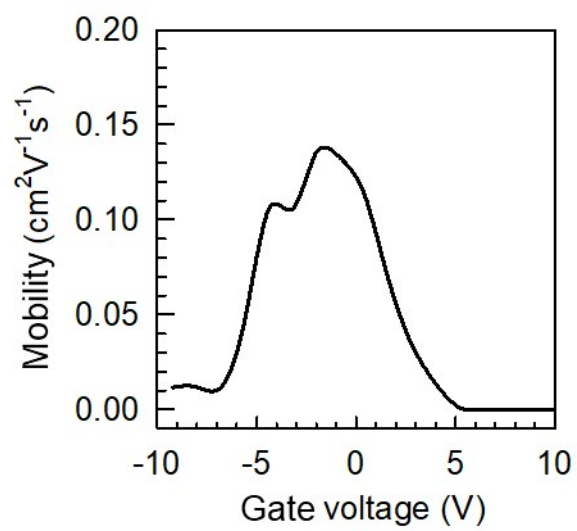

**Figure S5.** Gate-voltage dependent mobility extracted in the saturation regime of the diF-TES-ADT OTFT.

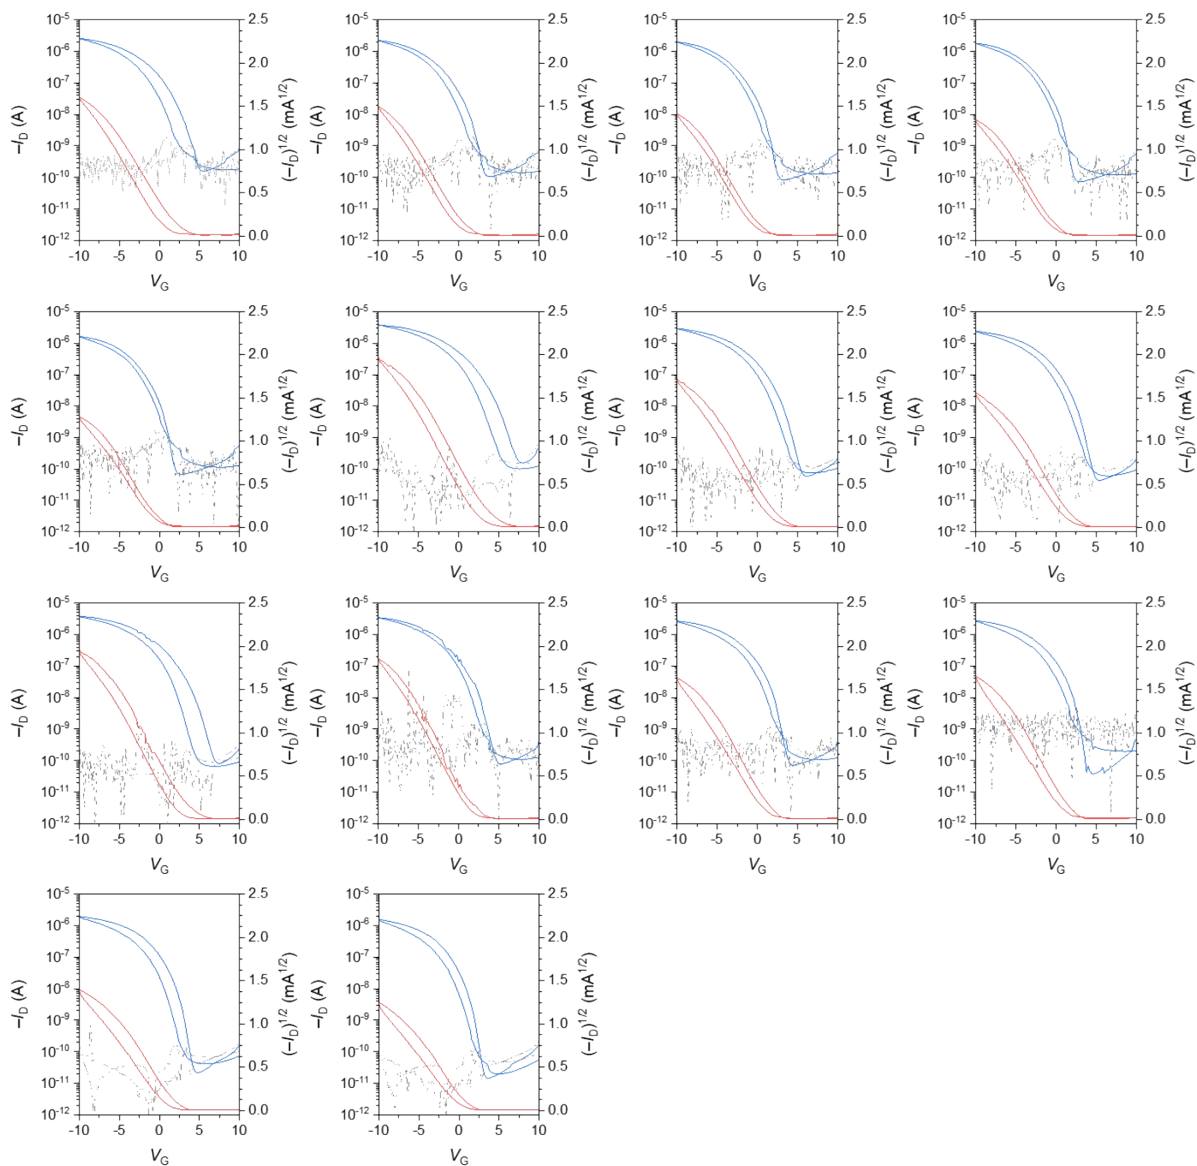

**Figure S6.** Transfer characteristics of 14 OTFT devices using diF-TES-ADT semiconductor and c-PVP dielectric which were prepared at the same bar-coating condition.
